# Supplementary material
Source: MDPI journal article supplement (https://www.mdpi.com/2037-0164/13/4/44)
Supplement: s1 [file s1]

# Quality Control, Phytochemical Profile and Antibacterial Effect of *Origanum compactum* Benth. Essential Oil from Morocco

**Table S1.** Distribution of water salinity classes according to the USSLS standard, Richard, 1954 [27].

| Soil class           | EC in dS/m       |
|----------------------|------------------|
| Non-saline           | EC < 0.25        |
| Moderately saline    | 0.25 < EC < 0.75 |
| Highly saline        | 0.75 < EC < 2.25 |
| Very strongly saline | 2.25 < EC < 5    |
| Extremely salty      | EC > 5           |

**Table S2.** Distribution of water nitrate classes according to standards DIAEA/DRHA/SEEN 2008 [30].

| Soil class | NO <sub>3</sub> <sup>-</sup> in ppm |
|------------|-------------------------------------|
| Excellent  | 5                                   |
| Good       | 5-25                                |
| Average    | 25-50                               |
| Wrong      | 50                                  |

**Table S3.** Soil pH Rating along with the studied soil pH.

| Soil class               | pH according to standards | pH of the studied soil |
|--------------------------|---------------------------|------------------------|
| Acid                     | 6                         | 8.50                   |
| Weakly acidic            | 6 - 6.5                   |                        |
| Neutral                  | 6.5 - 7.3                 |                        |
| Weakly basic             | 7.3 - 7.8                 |                        |
| Medium basic             | 7.8 - 8.5                 |                        |
| <b>Alkaline tendency</b> | <b>8.5 - 9</b>            |                        |
| Very alkaline            | 9                         |                        |

**Table S4.** Soil salinity ranking.

| Soil class           | EC in dS/m according to the standards | EC in dS/m of the soil studied |
|----------------------|---------------------------------------|--------------------------------|
| <b>Non-saline</b>    | 4                                     | 0.119                          |
| Little saline        | 4 - 8                                 |                                |
| salt                 | 8 - 16                                |                                |
| Highly saline        | 16 - 32                               |                                |
| Very strongly saline | 32                                    |                                |

**Table S5.** P<sub>2</sub>O<sub>5</sub> assimilable phosphorus classes.

| Soil class   | P <sub>2</sub> O <sub>5</sub> values (in ppm) |
|--------------|-----------------------------------------------|
| Very low     | <15                                           |
| <b>Low</b>   | 15-30                                         |
| Well-endowed | 30-45                                         |
| High         | 45-100                                        |
| Very high    | >100                                          |

**Table S6.** Distribution of soil OM classes according to DIAEA/DRHA/SEEN (2008) [30].

| Soil class       | MO (%)  |
|------------------|---------|
| <b>Very poor</b> | < 0,7   |
| Poor             | 0,7-1,5 |
| Moderately poor  | 1,5-3   |
| Rich             | 3-6     |
| Very rich        | >6      |
